# Supplementary material
Source: ML conference proceedings conference paper supplement (https://openreview.net/forum?id=xWbV6wZjro)
Supplement: supplementary_material [file attachment]

## Supplementary Materials: BUNDL

---

### Algorithm 1 BUNDL Uncertainty Computation from MCMC Samples

---

**Require:**  $f_\theta(\cdot)$ ,  $x$  from current epoch

**Ensure:** no gradient computation

```

 $N \leftarrow 20$  ▷ Number of MCMC samples
 $n \leftarrow 1$ 
 $\bar{f} \leftarrow 0 \in \mathbb{R}^N$ 
while  $n \leq N$  do
     $\bar{f}^n \leftarrow f_\theta(x)$  ▷ Network output with dropout
end while
 $\overline{f_\theta(x)} = \frac{1}{N} \sum_{n=1}^N \bar{f}^n$  ▷ Average
 $z_x^y = \frac{-1}{0.6932N} \sum_{n=1}^N \bar{f}^n \log \bar{f}^n + (1 - \bar{f}^n) \log(1 - \bar{f}^n)$  ▷ Expected entropy
if truncate then
     $z_x^0 = 0.001$  ▷ Oversegmented seizure
end if

```

---

### Algorithm 2 BUNDL training framework

---

**Require:**  $\theta$ , learning rate  $\alpha$ , number of epochs  $M$ ,  $\{x, p_g\} \in$  batched training data

```

 $\theta \leftarrow \theta_{pre}$  ▷ Pretrained with clean samples and  $z_x^y = 0$ 
 $m \leftarrow 1$ 
while  $m \leq N$  do
    for  $x^i, p_g^i \in \text{traindata}$  do
        Predict  $f_\theta(x^i)$ 
         $\overline{f_\theta(x)}, z_x^y \leftarrow$  from Algorithm 1
         $p_{yc} = p_g(z_x^1 \cdot \overline{f_\theta(x)} + p_g(1 - z_x^1)) + (1 - p_g)(z_x^0 \cdot \overline{f_\theta(x)} + p_g(1 - z_x^0))$ 
         $\mathcal{L} = p_{yc} \cdot \log(\overline{f_\theta(x)}) + (1 - p_{yc}) \cdot \log(1 - \overline{f_\theta(x)})$ 
         $\theta \leftarrow \theta - \alpha \nabla \mathcal{L}$ 
    end for
end while

```

---

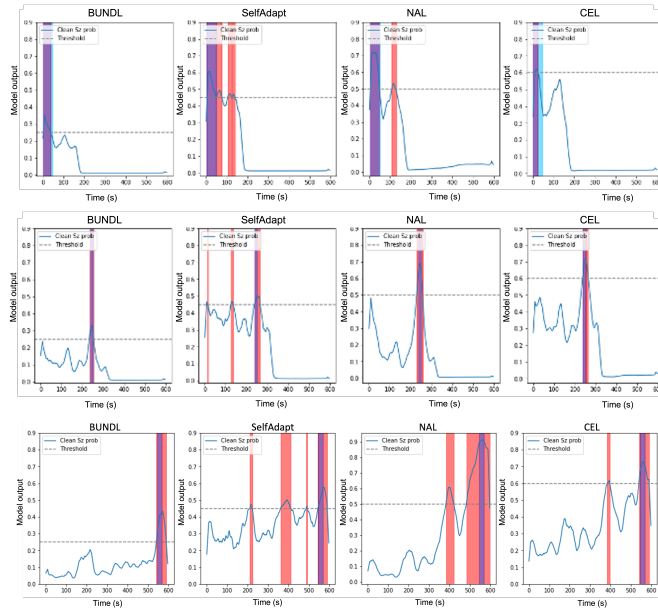

Fig. 1: Visualization of three seizures predicted by BUNDL and Baseline algorithms. Blue line is predicted clean seizure probability  $p_{yc}$ . We denote given seizure intervals in blue, and predicted seizure intervals in red, and their intersection (correct seizure predictions) in purple.

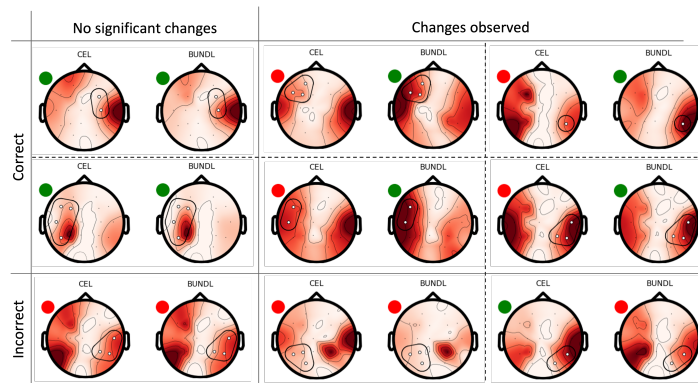

Fig. 2: SOZ localization by (a) DeepSOZ-BUNDL (b) DeepSOZ-CEL. Predicted SOZ is given by red heatmap. True SOZ is marked in black. Correct SOZ is indicated by green dot and incorrect SOZ is indicated by red dot in upper left.
